# Supplementary material for: A porous graphitic biochar wrapped Co9S8 core–shell composite enables pH-universal activation of peroxymonosulfate for highly efficient and rapid antibiotics degradation
Source: Royal Society of Chemistry journal article supplement (doi:10.1039/d2en00418f), 2022-01-01
Supplement: d2en00418f1.pdf [file d2en00418f1.pdf]

**A porous graphitic biochar wrapped Co<sub>9</sub>S<sub>8</sub> core-shell composite enables pH-universal activation of peroxymonosulfate for highly efficient and rapid antibiotics degradation**

**Text. S1. Electron spin resonance (EPR) spectroscopy experiments**

20  $\mu\text{L}$  of DMPO (20 mM) as spin-trapping agent  $\text{SO}_4^{\bullet-}$  and  $\bullet\text{OH}$  was added into 5 mL of reaction solution immediately. Similarly, 20  $\mu\text{L}$  of TEMP (20 mM) as spin-trapping agent  $^1\text{O}_2$  was added into 5 mL of reaction solution immediately. To capture  $\text{O}_2^{\bullet-}$ , 20  $\mu\text{L}$  of the mixture solution containing DMPO (20 mM) and EtOH (20 mM) was added into 5 mL of reaction solution. Then, the solution was detected by a A300-10/12 spectrometer after 5 min or 10 min reaction, respectively.

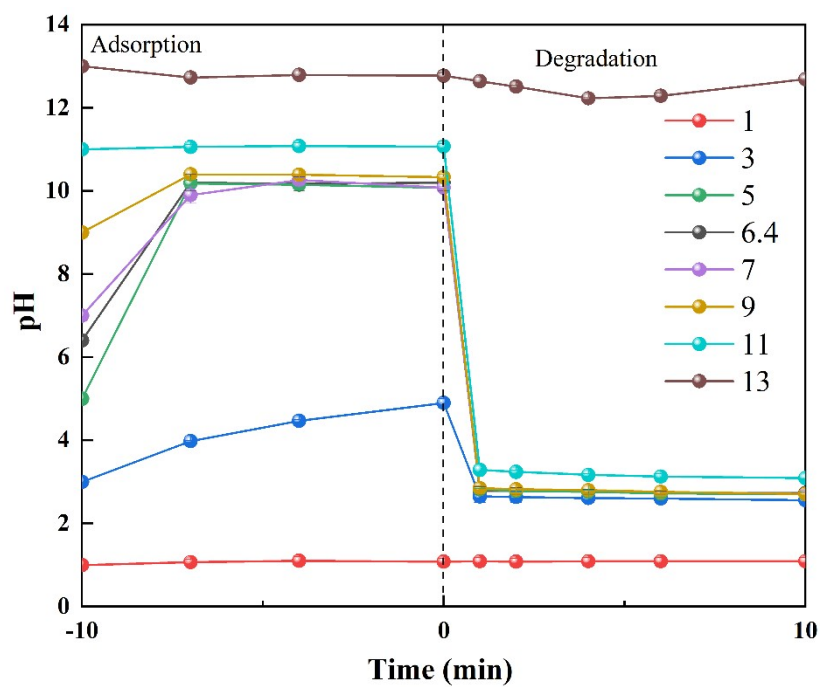

**Fig. S1.** Change of pH in solution under different pHi of solution. Reaction conditions:

$[\text{SMX}]_0 = 20 \text{ mg/L}$ ,  $\text{pHi} = 6.4$ ,  $[\text{catalyst}]_0 = 0.1 \text{ g/L}$ ,  $[\text{PMS}]_0 = 7 \text{ mM}$ .

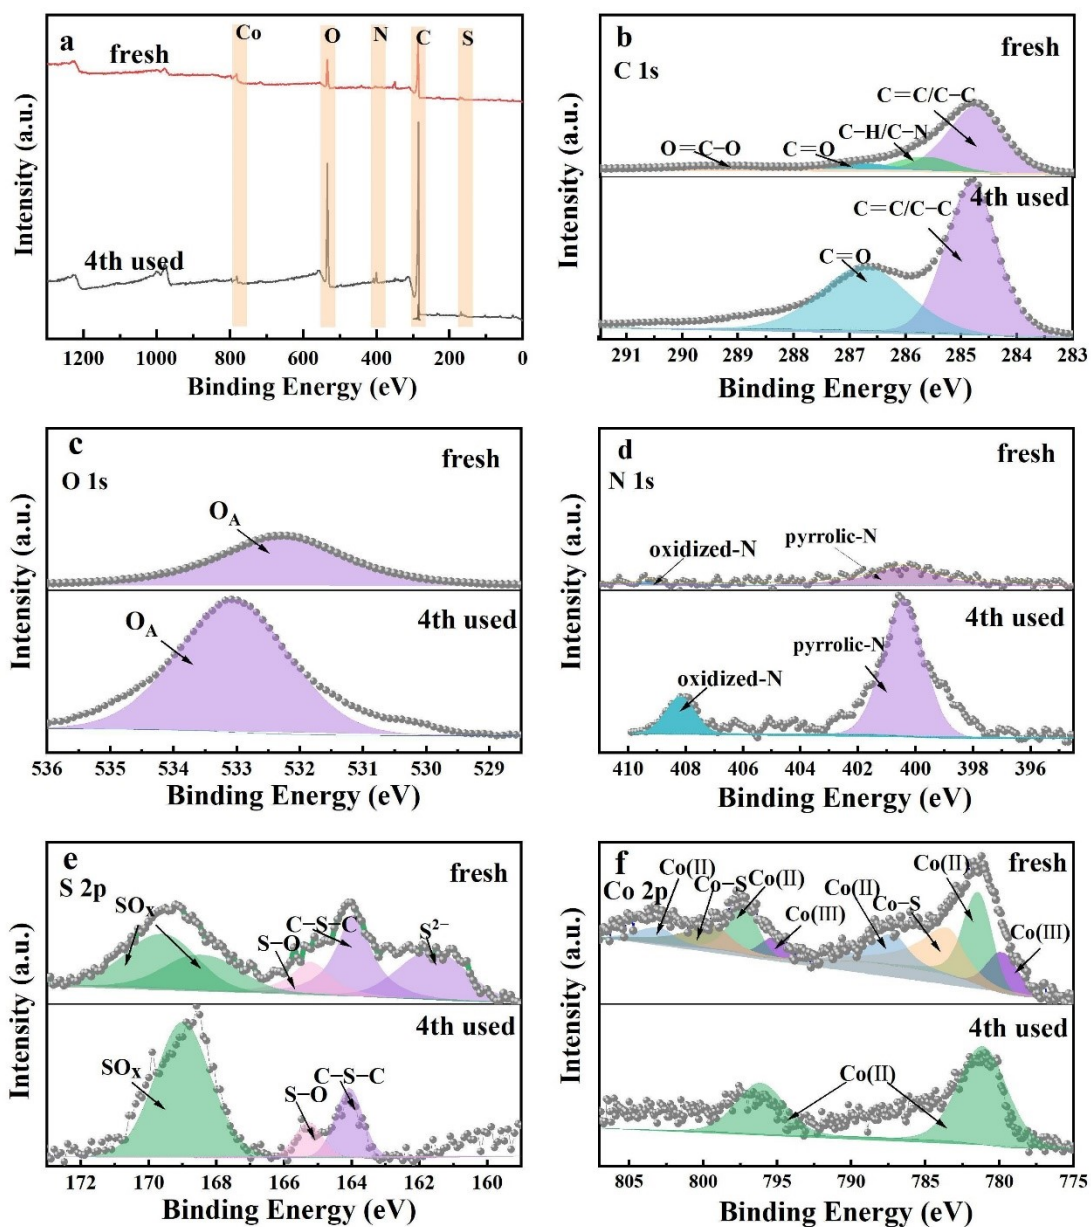

**Fig. S2.** (a) XPS survey spectrum, (b) C 1s spectrum, (c) O 1s spectrum, (d) N 1s spectrum, (e) S 2p spectrum and (f) Co 2p spectrum of fresh and 4th used catalyst.

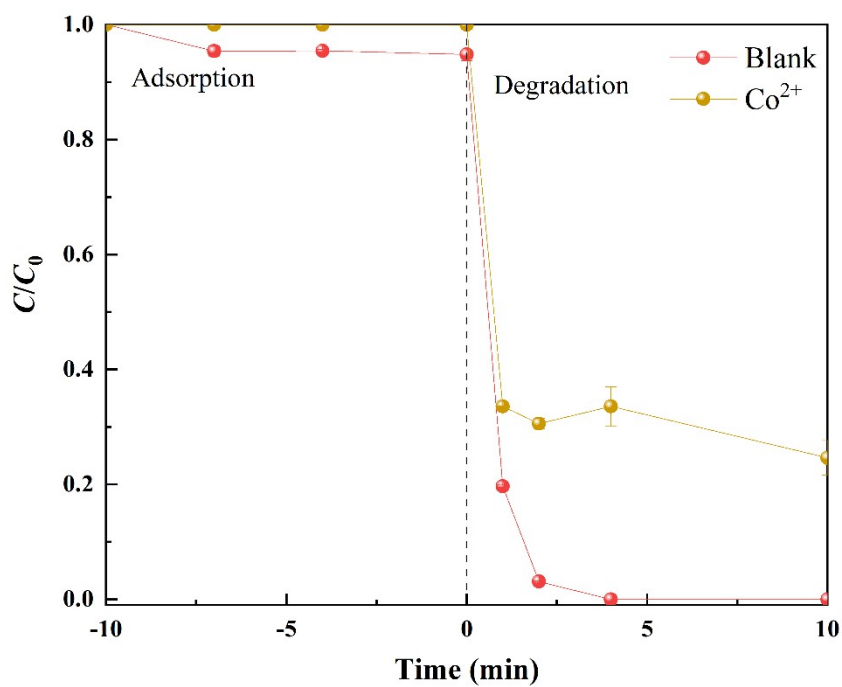

**Fig. S3.** Degradation of SMX by cobalt ion. Reaction conditions:  $[\text{SMX}]_0 = 20 \text{ mg/L}$ ,  $\text{pHi} = 6.4$ ,  $[\text{catalyst}]_0 = 0.1 \text{ g/L}$ ,  $[\text{PMS}]_0 = 7 \text{ mM}$ .

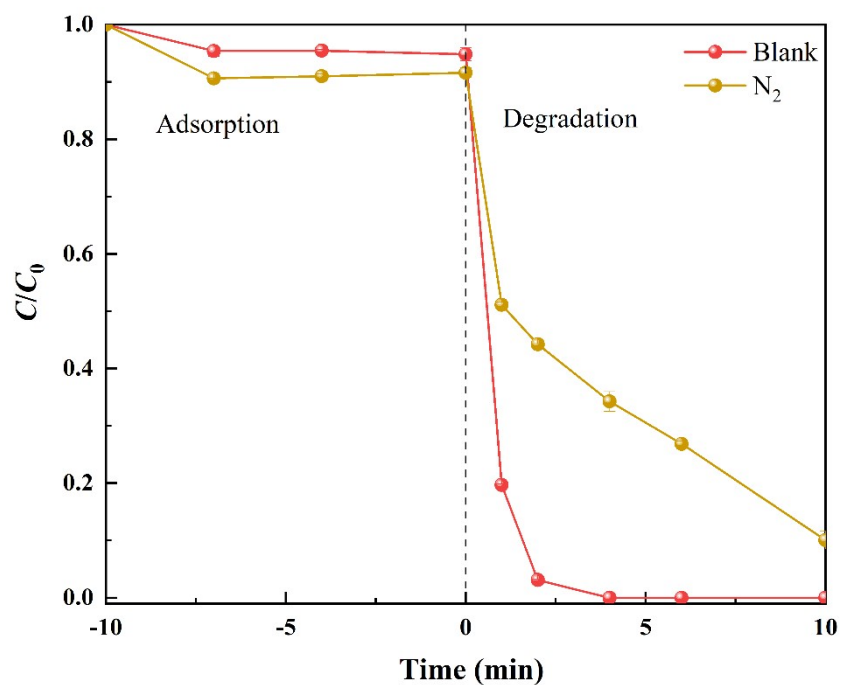

**Fig. S4.** SMX degradation effect in  $\text{N}_2$  atmosphere. Reaction conditions:  $[\text{SMX}]_0 = 20 \text{ mg/L}$ ,  $\text{pHi} = 6.4$ ,  $[\text{catalyst}]_0 = 0.1 \text{ g/L}$ ,  $[\text{PMS}]_0 = 7 \text{ mM}$ .

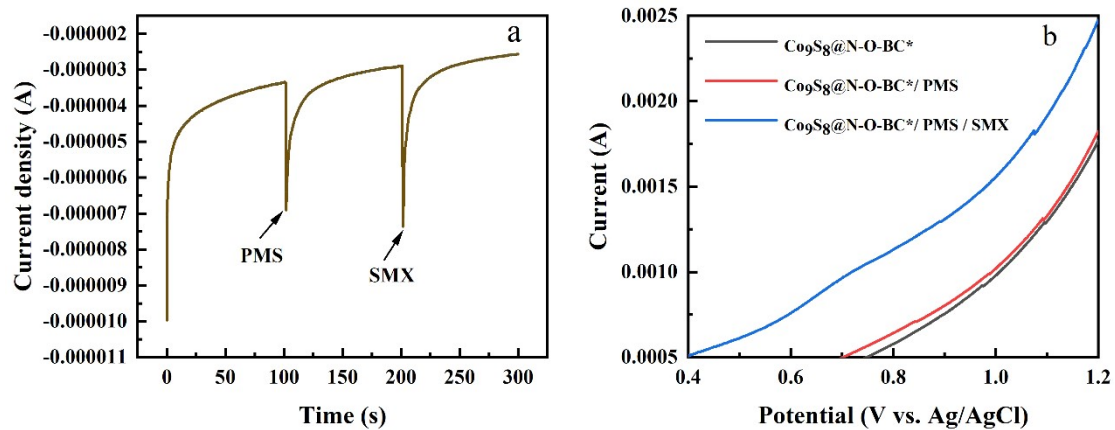

**Fig. S5.** (a) The  $i-t$  curves of  $\text{Co}_9\text{S}_8@\text{N-O-BC}^*/\text{PMS}$  system. (b) Linear sweep voltammetry (LSV) curves obtained from different systems.
